# Supplementary material
Source: Research Square preprint supplement (doi:10.21203/rs.3.rs-9338081/v1)
Supplement: Supplementary file 1 [file 59ae0529d807ab3bcd69c73c.pdf]

## Supplementary Material: Original Uncropped Western Blot Images

This document provides the full, original, and uncropped images of the Western blots presented in **Figure 9** of the main manuscript. For all blots, the experimental groups loaded in the lanes (from left to right) correspond to: **NC, OA, 1.86 g/kg QH, and 0.93 g/kg QH.**

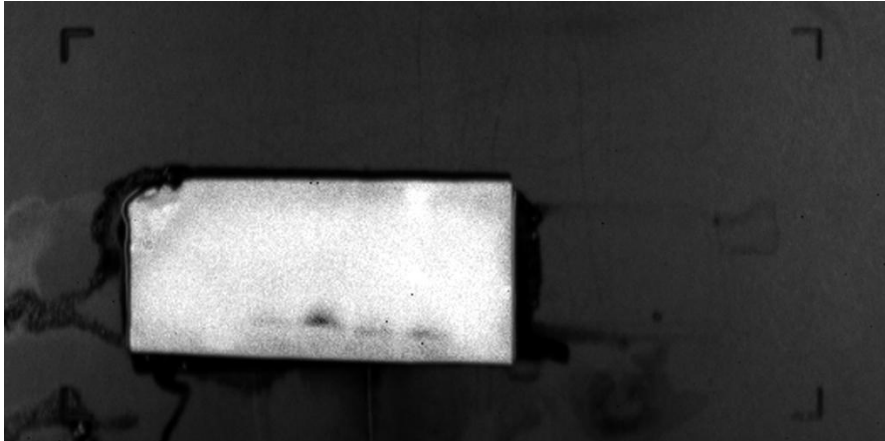

**Supplementary Figure S1.** Original uncropped blot for Cleaved-Caspase-3 (C-Caspase-3).

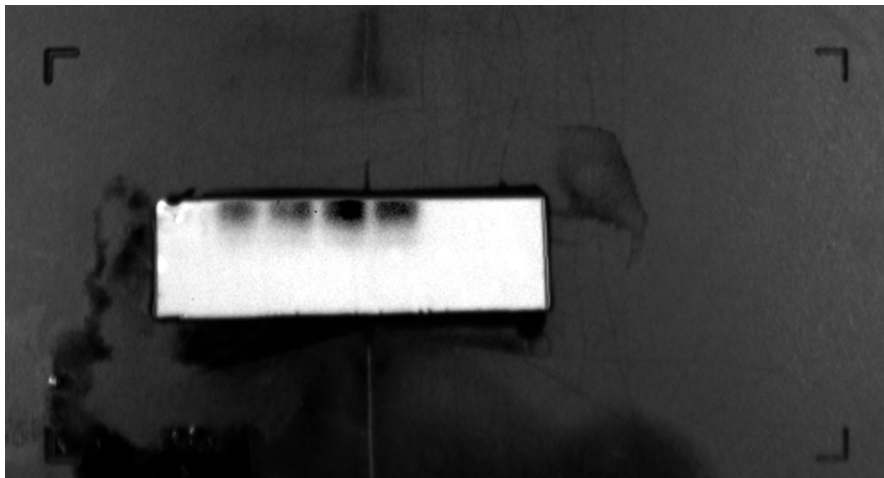

**Supplementary Figure S2.** Original uncropped blot for Caspase-3.

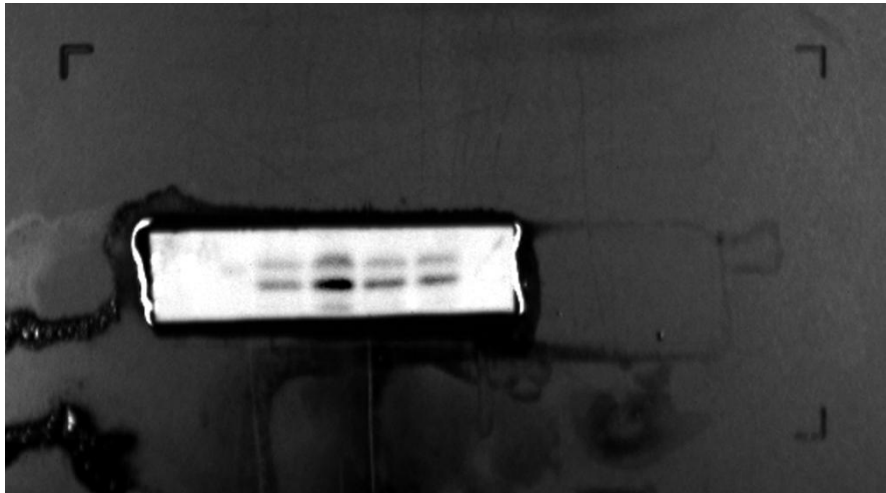

**Supplementary Figure S3.** Original uncropped blot for Phospho-MAPK1 (P-MAPK1).

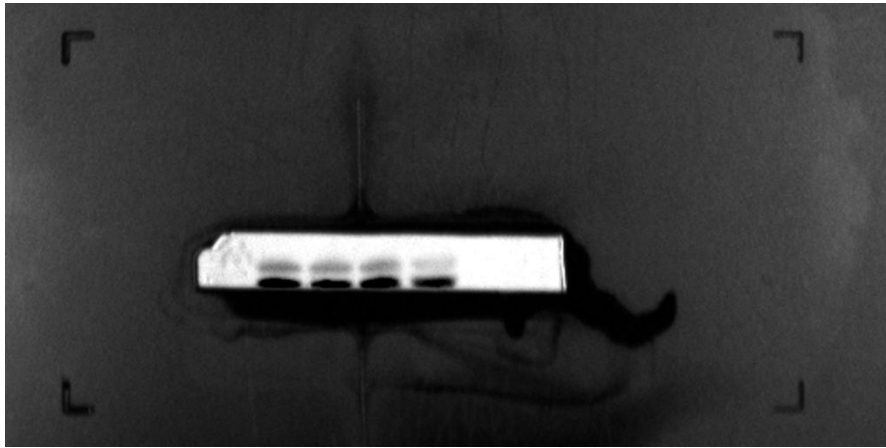

**Supplementary Figure S4.** Original uncropped blot for MAPK1.

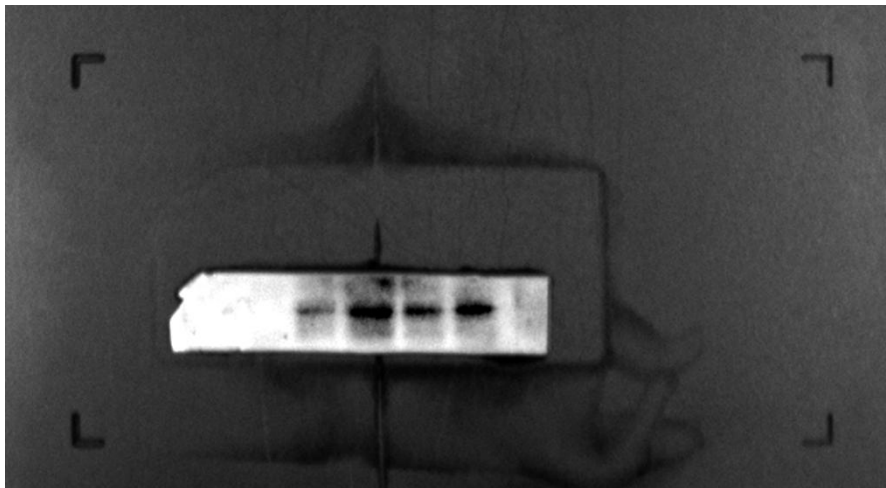

**Supplementary Figure S5.** Original uncropped blot for Phospho-AKT1 (P-AKT1).

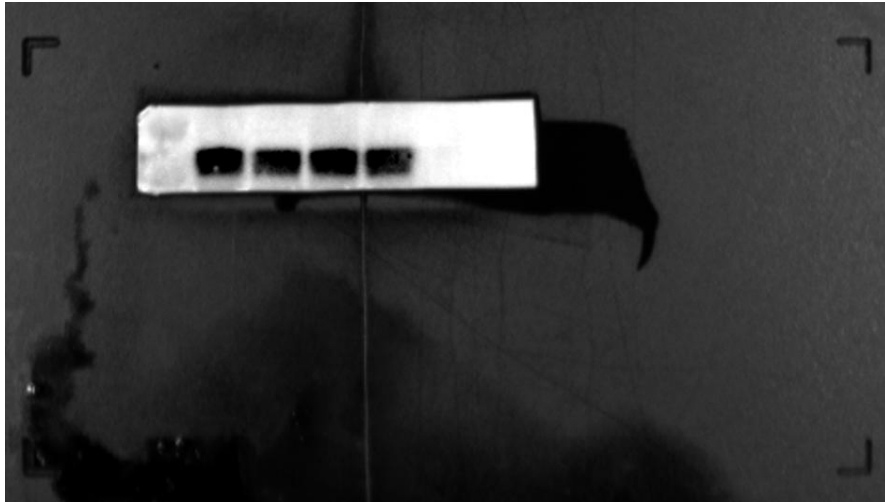

**Supplementary Figure S6.** Original uncropped blot for AKT1.

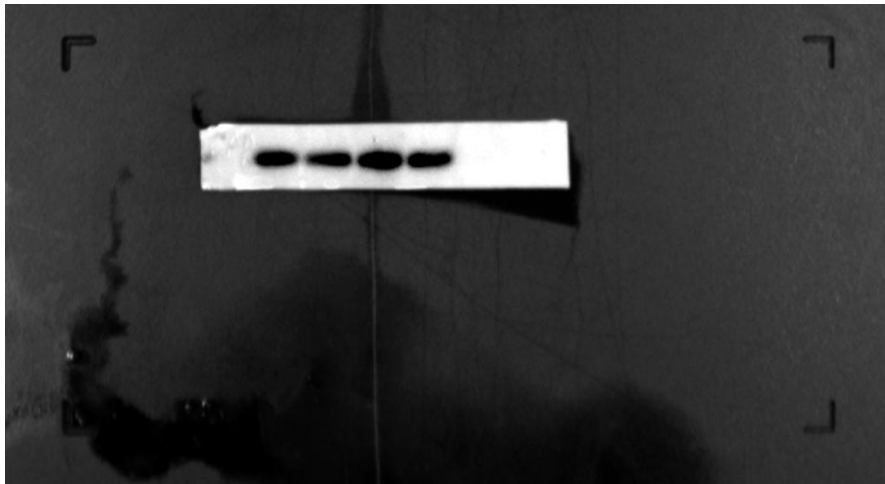

**Supplementary Figure S7.** Original uncropped blot for GAPDH
